# Supplementary material
Source: PubMed Central journal article supplement (PMC6488329)
Supplement: skz098_suppl_supplementary_figure_legends.pdf [file skz098_suppl_supplementary_figure_legends.pdf]

**Supplementary Figure 1:** The effects of replicate (summer or spring) on (A) huddling, (B) active, (C) resting, (D) aggressive, (E) eating/drinking, and (F) non-visible behavior on d 2, 4, 8, and 12 post-weaning and transport. An asterisk (\*) on the legend indicates overall replicate differences ( $P < 0.05$ ), #,~,^ symbols indicate overall day differences ( $P < 0.05$ ), <sup>a,b</sup> letters indicate replicate by day differences ( $P \leq 0.05$ ), and <sup>x,y</sup> letters indicate replicate by day tendencies ( $0.05 < P \leq 0.10$ ).
