# Supplementary material
Source: PubMed Central journal article supplement (PMC6488329)

# Supplementary Figure 1

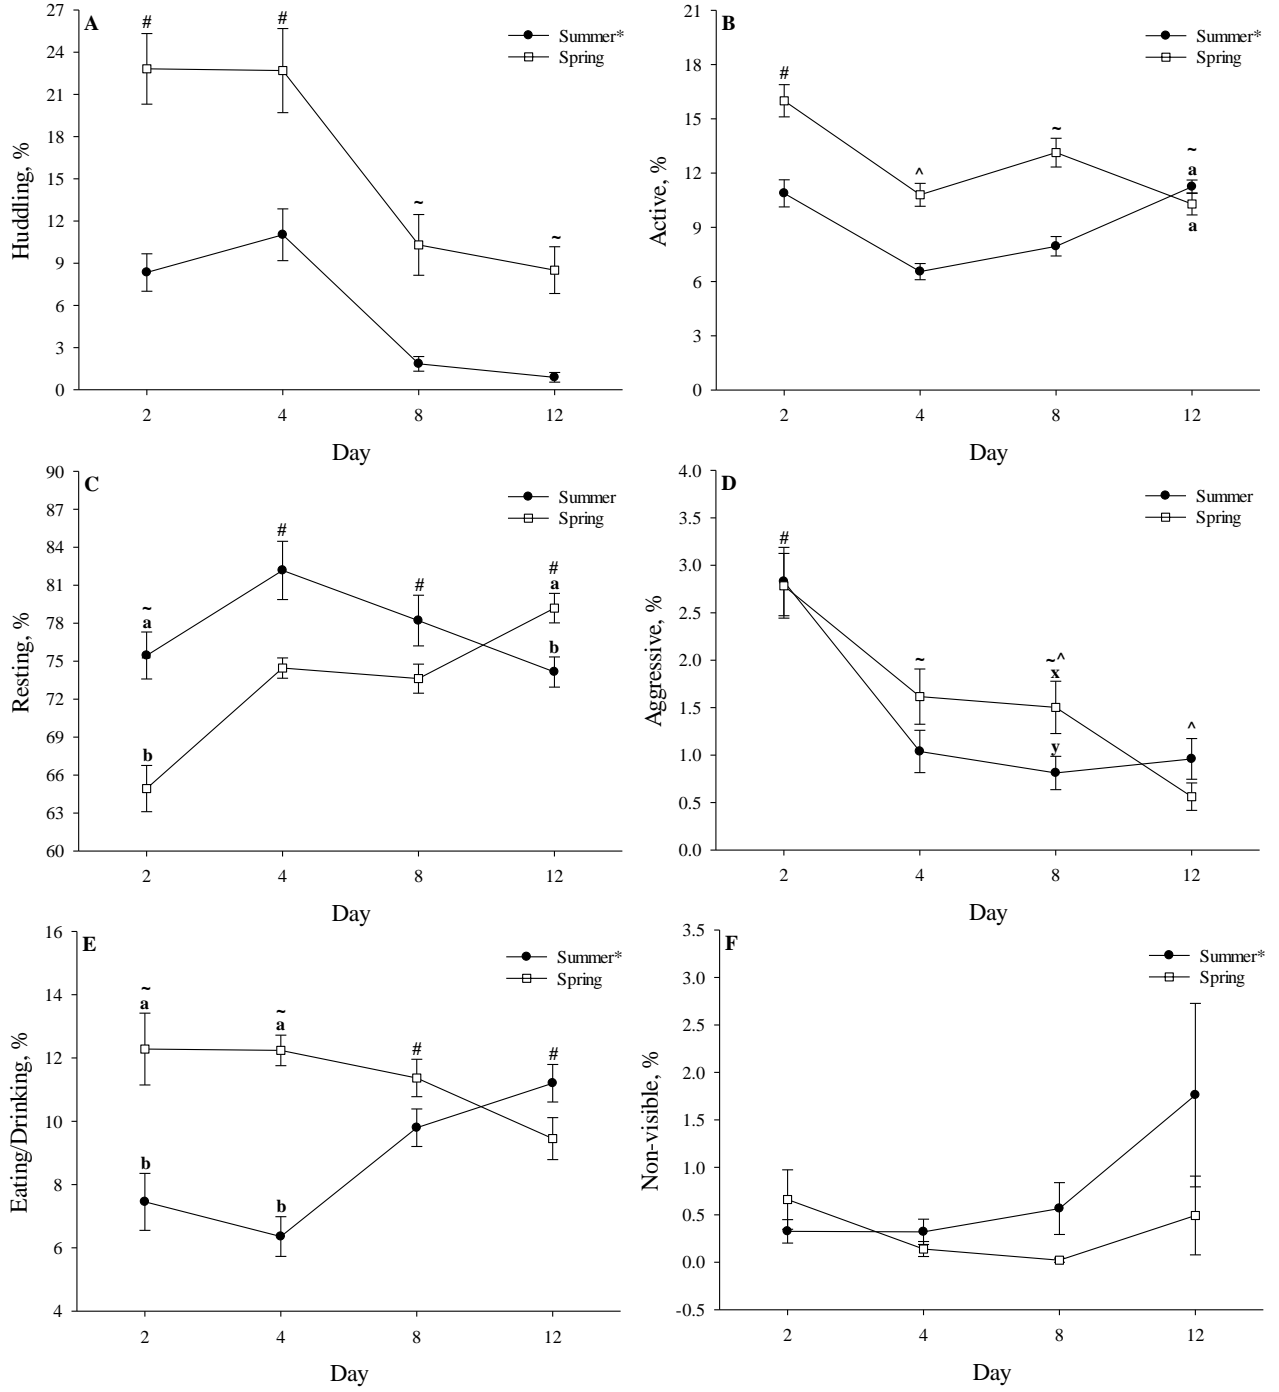

Supplement: skz098_suppl_supplementary_figure_1.pdf [file skz098_suppl_supplementary_figure_1.pdf]
